# Supplementary material
Source: PubMed Central journal article supplement (PMC3584884)
Supplement: IAI.00889-12_zii999090030so3.pdf [file IAI.00889-12_zii999090030so3.pdf]

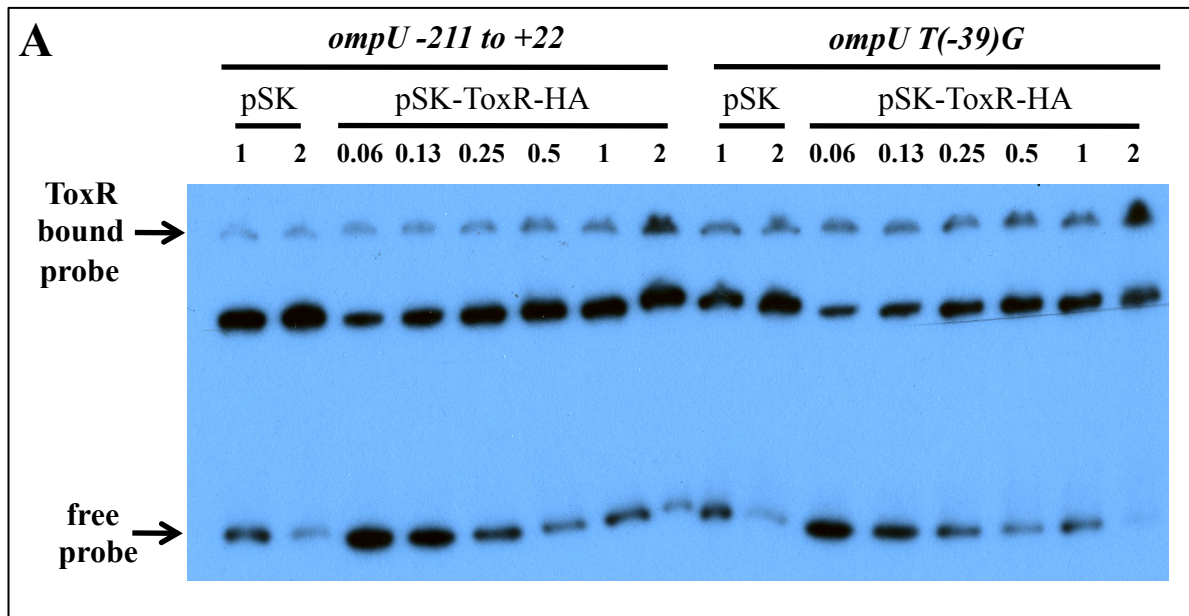

**Figure S3A:** Effects of single nucleotide substitution on gels shifts of various ToxR-regulated promoters. *V. cholerae* membranes containing (pSK-ToxR-HA) or lacking ToxR (pSK) were mixed at increasing concentrations with radioactively labeled probes from wild-type or mutated *ompU* (A), promoters. Due to the fact that there are multiple ToxR-binding sites in the *ompU* promoter, no clear defect in DNA binding was observed with the mutated promoter probe.
